# Supplementary material
Source: publisher site journal article supplement (https://www.spandidos-publications.com/401/downloadSupplementary)
Supplement: Supplementary file 1 [file downloadSupplementary]

## Sheet: TableS1
Table SI. Clinical information of the 100 patients.
TRACERxID	Stage	Age	Gender	Ethnicity	Histology	Tumor size	Resection margins	Vascular invasion	Pleural invasion	Adjuvant therapy	ECOG	Smoking status	Pack years	Genome doubled	Recurrence or death	Time_to_recurrence_or_death (months)
CRUK0001	2a	84	Male	White- British	Invasive adenocarcinoma	26	R0	no	Yes	No adjuvant treatment	1	Ex-Smoker	31	Clonal GD	0	21.337
CRUK0002	1b	81	Male	White- British	Invasive adenocarcinoma	35	R0	yes	No	No adjuvant treatment	1	Ex-Smoker	8	Clonal GD	0	16.8329
CRUK0003	3a	78	Female	White- British	Invasive adenocarcinoma	52	R0	yes	No	Adjuvant	0	Never Smoked	NA	Clonal GD	1	7.13425
CRUK0004	2b	69	Female	White- British	Invasive adenocarcinoma	47	R0	no	Yes	Adjuvant	0	Ex-Smoker	13.5	Clonal GD	1	10.6849
CRUK0005	3a	74	Female	White- British	Invasive adenocarcinoma	43	R0	yes	Yes	No adjuvant treatment	1	Ex-Smoker	55	Clonal GD	1	21.337
CRUK0006	1a	66	Male	White- British	Invasive adenocarcinoma	18	R0	yes	No	No adjuvant treatment	0	Recent Ex-Smoker	NA	Clonal GD	0	13.0521
CRUK0007	1a	69	Male	White- British	Invasive adenocarcinoma	18	R0	no	No	No adjuvant treatment	0	Ex-Smoker	0.45	Clonal GD	0	18.5425
CRUK0008	1a	72	Male	White- Irish	Invasive adenocarcinoma	25	R0	no	No	No adjuvant treatment	1	Ex-Smoker	74	Clonal GD	0	23.5068
CRUK0009	2b	55	Male	White- British	Invasive adenocarcinoma	65	R0	yes	No	Adjuvant	0	Recent Ex-Smoker	10.25	Clonal GD	0	16.9644
CRUK0010	3a	68	Male	White- British	Invasive adenocarcinoma	32	R0	no	No	Adjuvant	0	Never Smoked	NA	Clonal GD	0	13.8411
CRUK0011	1b	71	Female	White- British	Invasive adenocarcinoma	40	R0	no	No	No adjuvant treatment	1	Ex-Smoker	35	Subclonal GD	0	15.3534
CRUK0012	1a	65	Male	White- British	Invasive adenocarcinoma	28	R0	no	No	No adjuvant treatment	1	Ex-Smoker	14.25	Clonal GD	0	18.6411
CRUK0013	3a	67	Male	White- British	Invasive adenocarcinoma	35	R0	yes	No	Adjuvant	0	Ex-Smoker	26.25	Clonal GD	0	8.81096
CRUK0014	1a	66	Male	White- British	Invasive adenocarcinoma	13	R0	no	No	No adjuvant treatment	0	Never Smoked	NA	Not GD	0	16.1753
CRUK0015	1a	73	Female	White- British	Invasive adenocarcinoma	19	R0	no	No	No adjuvant treatment	0	Never Smoked	NA	Clonal GD	0	24.263
CRUK0016	1b	70	Male	White- British	Invasive adenocarcinoma	28	R0	yes	Yes	Adjuvant	1	Ex-Smoker	73.5	Clonal GD	0	17.5562
CRUK0017	1b	77	Female	White- British	Invasive adenocarcinoma	18	R0	no	No	No adjuvant treatment	1	Recent Ex-Smoker	42	Clonal GD	0	22.0274
CRUK0018	1a	59	Male	White- British	Invasive adenocarcinoma	24	R0	yes	No	No adjuvant treatment	0	Ex-Smoker	27.75	Clonal GD	0	24.6575
CRUK0019	1b	54	Female	White- British	Invasive adenocarcinoma	32	R0	no	No	No adjuvant treatment	1	Never Smoked	NA	Clonal GD	0	15.4521
CRUK0020	1b	83	Male	White- British	Invasive adenocarcinoma	19	R0	yes	Yes	No adjuvant treatment	1	Ex-Smoker	102	Clonal GD	0	23.8027
CRUK0021	1a	83	Female	White- British	Invasive adenocarcinoma	18	R1	no	No	No adjuvant treatment	0	Never Smoked	NA	Clonal GD	1	17.6548
CRUK0022	3a	65	Female	White- British	Invasive adenocarcinoma	27	R0	yes	Yes	Adjuvant	0	Ex-Smoker	32.25	Clonal GD	0	8.51507
CRUK0023	2b	68	Male	White- British	Invasive adenocarcinoma	71	R0	no	No	Adjuvant	0	Ex-Smoker	39	Not GD	1	10.389
CRUK0024	1b	68	Male	White- British	Invasive adenocarcinoma	52	R0	yes	No	No adjuvant treatment	1	Recent Ex-Smoker	65	Clonal GD	0	28.5041
CRUK0025	1b	52	Male	White- British	Invasive adenocarcinoma	33	R0	yes	No	No adjuvant treatment	0	Recent Ex-Smoker	55.5	Clonal GD	0	5.91781
CRUK0026	1a	67	Female	White- British	Invasive adenocarcinoma	26	R0	no	No	No adjuvant treatment	0	Ex-Smoker	0.05	Clonal GD	0	24.6247
CRUK0027	2a	58	Female	White- British	Invasive adenocarcinoma	22	R0	no	Yes	Adjuvant	0	Recent Ex-Smoker	30	Not GD	0	21.1726
CRUK0028	1b	78	Female	White- British	Invasive adenocarcinoma	22	R0	no	No	No adjuvant treatment	0	Ex-Smoker	17.5	Not GD	0	19.2
CRUK0029	3a	56	Male	White- British	Invasive adenocarcinoma	70	R0	no	Yes	No adjuvant treatment	1	Ex-Smoker	35	Clonal GD	1	1.77534
CRUK0030	3a	75	Male	White- British	Invasive adenocarcinoma	14	R0	no	Yes	Adjuvant	0	Ex-Smoker	60	Not GD	0	18.3781
CRUK0031	1b	59	Male	Caribbean	Invasive adenocarcinoma	40	R0	yes	No	Adjuvant	1	Recent Ex-Smoker	30	Clonal GD	0	20.4822
CRUK0032	1b	73	Male	White- British	Invasive adenocarcinoma	34	R0	no	No	No adjuvant treatment	1	Recent Ex-Smoker	58	Clonal GD	0	1.64384
CRUK0033	1a	68	Male	White- British	Invasive adenocarcinoma	21	R0	no	No	No adjuvant treatment	0	Never Smoked	NA	Not GD	0	19.1342
CRUK0034	1b	68	Female	White- Irish	Invasive adenocarcinoma	40	R0	yes	No	No adjuvant treatment	0	Ex-Smoker	33	Clonal GD	0	29.9507
CRUK0035	3b	75	Male	White- Other	Invasive adenocarcinoma	28	R0	yes	No	Adjuvant	1	Ex-Smoker	28	Clonal GD	1	12.8877
CRUK0036	1b	64	Female	White- British	Invasive adenocarcinoma	40	R0	no	No	No adjuvant treatment	1	Recent Ex-Smoker	33.75	Clonal GD	1	10.0603
CRUK0037	2b	83	Male	White- British	Invasive adenocarcinoma	75	R0	no	No	No adjuvant treatment	1	Ex-Smoker	9.75	Not GD	1	10.2904
CRUK0038	1b	81	Female	White- British	Invasive adenocarcinoma	25	R1	yes	Yes	No adjuvant treatment	0	Ex-Smoker	32	Not GD	0	18.0164
CRUK0039	1b	70	Male	White- British	Invasive adenocarcinoma	48	R0	yes	Yes	No adjuvant treatment	1	Ex-Smoker	52	Clonal GD	0	24.4603
CRUK0040	1a	62	Female	White- British	Invasive adenocarcinoma	14	R0	no	No	No adjuvant treatment	0	Ex-Smoker	40	Not GD	0	1.4137
CRUK0041	1b	72	Male	White- Other	Invasive adenocarcinoma	35	R0	yes	Yes	No adjuvant treatment	1	Ex-Smoker	62	Clonal GD	1	3.45205
CRUK0042	1a	68	Male	White- British	Invasive adenocarcinoma	30	R0	no	No	No adjuvant treatment	1	Never Smoked	NA	Not GD	0	24.0329
CRUK0043	1a	68	Male	White- British	Invasive adenocarcinoma	20	R0	no	No	No adjuvant treatment	0	Ex-Smoker	4	Clonal GD	0	22.0932
CRUK0044	1a	59	Female	White- British	Invasive adenocarcinoma	23	R0	yes	No	No adjuvant treatment	1	Current Smoker	33.75	Not GD	1	6.37808
CRUK0045	1b	85	Male	White- British	Invasive adenocarcinoma	48	R0	yes	Yes	No adjuvant treatment	1	Ex-Smoker	11	Clonal GD	0	25.0192
CRUK0046	2a	61	Female	White- British	Invasive adenocarcinoma	60	R1	no	Yes	Adjuvant	0	Ex-Smoker	15	Not GD	0	21.337
CRUK0047	1a	72	Female	White- British	Invasive adenocarcinoma	21	R0	no	No	No adjuvant treatment	0	Ex-Smoker	33.75	Not GD	0	19.5616
CRUK0048	1b	76	Female	White- British	Invasive adenocarcinoma	33	R0	no	No	No adjuvant treatment	1	Recent Ex-Smoker	49	Clonal GD	0	15.9123
CRUK0049	1a	66	Female	White- British	Invasive adenocarcinoma	20	R0	no	No	No adjuvant treatment	0	Recent Ex-Smoker	48	Not GD	0	14.3014
CRUK0050	3a	55	Male	White- British	Invasive adenocarcinoma	120	R0	no	No	No adjuvant treatment	1	Current Smoker	42	Clonal GD	1	16.5699
CRUK0051	1b	76	Male	White- British	Invasive adenocarcinoma	50	R0	no	No	No adjuvant treatment	1	Ex-Smoker	73.5	Clonal GD	0	26.2356
CRUK0052	3a	59	Female	White- British	Invasive adenocarcinoma	37	R0	yes	No	Adjuvant	0	Ex-Smoker	35	Clonal GD	0	21.337
CRUK0053	1b	68	Male	White- British	Invasive adenocarcinoma	19	R0	yes	Yes	No adjuvant treatment	0	Ex-Smoker	74	Clonal GD	0	21.1068
CRUK0054	1a	76	Female	White- British	Invasive adenocarcinoma	14	R0	no	No	No adjuvant treatment	0	Never Smoked	NA	Clonal GD	0	16.6027
CRUK0055	2b	54	Male	Caribbean	Invasive adenocarcinoma	45	R0	yes	No	Adjuvant	0	Recent Ex-Smoker	20	Clonal GD	0	23.8685
CRUK0056	1b	71	Female	White- British	Invasive adenocarcinoma	25	R0	no	Yes	No adjuvant treatment	1	Ex-Smoker	90	Clonal GD	0	17.7534
CRUK0057	1b	67	Female	White- British	Invasive adenocarcinoma	22	R0	yes	Yes	No adjuvant treatment	1	Recent Ex-Smoker	53	Clonal GD	0	26.9918
CRUK0058	2b	74	Male	White- Irish	Invasive adenocarcinoma	16	R0	no	No	Adjuvant	0	Ex-Smoker	34	Clonal GD	0	21.863
CRUK0059	1a	79	Female	White- British	Invasive adenocarcinoma	11	R0	no	No	No adjuvant treatment	1	Never Smoked	NA	Not GD	0	12.5589
CRUK0060	1a	48	Female	White- British	Invasive adenocarcinoma	10	R0	no	No	No adjuvant treatment	0	Recent Ex-Smoker	22.5	Clonal GD	0	25.3808
CRUK0061	1b	82	Male	White- British	Invasive adenocarcinoma	30	R0	no	No	No adjuvant treatment	1	Ex-Smoker	40	Clonal GD	0	23.2767
CRUK0062	2b	57	Male	Caribbean	Squamous cell carcinoma	55	R0	no	No	Adjuvant	1	Recent Ex-Smoker	19	Subclonal GD	1	24.4274
CRUK0063	2a	65	Male	White- British	Squamous cell carcinoma	50	R0	yes	No	Adjuvant	0	Current Smoker	57.5	Subclonal GD	1	14.9918
CRUK0064	1b	68	Male	White- British	Squamous cell carcinoma	38	R0	no	Yes	No adjuvant treatment	0	Current Smoker	26.5	Clonal GD	0	16.3726
CRUK0065	2b	76	Male	White- British	Squamous cell carcinoma	75	R0	yes	No	No adjuvant treatment	0	Ex-Smoker	22.5	Not GD	1	8.71233
CRUK0066	1b	78	Male	White- British	Squamous cell carcinoma	42	R0	no	No	No adjuvant treatment	1	Recent Ex-Smoker	60	Clonal GD	0	25.0192
CRUK0067	1a	63	Male	White- British	Squamous cell carcinoma	10	R0	no	No	No adjuvant treatment	0	Recent Ex-Smoker	50	Not GD	0	22.9808
CRUK0068	1b	68	Female	White- British	Squamous cell carcinoma	38	R0	no	No	No adjuvant treatment	1	Recent Ex-Smoker	106	Not GD	0	21.7973
CRUK0069	1b	73	Female	White- British	Squamous cell carcinoma	50	R0	yes	Yes	Adjuvant	1	Ex-Smoker	44	Clonal GD	0	25.0192
CRUK0070	2a	56	Male	White- British	Squamous cell carcinoma	45	R0	yes	No	Adjuvant	1	Recent Ex-Smoker	41	Clonal GD	0	22.4877
CRUK0071	2a	66	Male	White- British	Squamous cell carcinoma	55	R0	no	No	Adjuvant	0	Ex-Smoker	80	Clonal GD	0	24.3945
CRUK0072	1b	67	Male	White- British	Squamous cell carcinoma	35	R0	yes	No	No adjuvant treatment	1	Ex-Smoker	25.5	Clonal GD	0	21.863
CRUK0073	1a	79	Female	White- British	Squamous cell carcinoma	21	R0	no	No	No adjuvant treatment	1	Ex-Smoker	16	Clonal GD	0	21.9288
CRUK0074	2b	80	Male	White- British	Squamous cell carcinoma	60	R0	no	Yes	No adjuvant treatment	1	Ex-Smoker	79.5	Clonal GD	0	16.5041
CRUK0075	1b	75	Male	White- British	Squamous cell carcinoma	30	R0	yes	Yes	No adjuvant treatment	1	Recent Ex-Smoker	41.3	Clonal GD	0	16.2082
CRUK0076	1b	63	Male	White- British	Squamous cell carcinoma	32	R0	no	No	No adjuvant treatment	1	Recent Ex-Smoker	102	Clonal GD	0	29.2274
CRUK0077	1b	72	Male	White- British	Squamous cell carcinoma	35	R1	yes	No	No adjuvant treatment	1	Ex-Smoker	58	Clonal GD	1	4.99726
CRUK0078	1b	58	Male	White- Irish	Squamous cell carcinoma	38	R0	yes	Yes	No adjuvant treatment	0	Recent Ex-Smoker	63	Clonal GD	0	24.9863
CRUK0079	2a	63	Female	White- British	Squamous cell carcinoma	60	R0	yes	No	Adjuvant	1	Recent Ex-Smoker	15	Clonal GD	0	3.61644
CRUK0080	2a	61	Male	White- British	Squamous cell carcinoma	37	R0	no	Yes	Adjuvant	0	Recent Ex-Smoker	56.25	Clonal GD	1	8.41644
CRUK0081	2a	72	Male	White- British	Squamous cell carcinoma	60	R0	no	No	No adjuvant treatment	0	Current Smoker	13.75	Clonal GD	1	16.274
CRUK0082	3a	63	Female	White- British	Squamous cell carcinoma	115	R0	yes	No	No adjuvant treatment	1	Recent Ex-Smoker	NA	Clonal GD	0	3.18904
CRUK0083	2b	72	Male	White- British	Squamous cell carcinoma	39	R0	yes	No	Adjuvant	0	Ex-Smoker	50	Clonal GD	0	21.337
CRUK0084	1b	65	Female	White- British	Squamous cell carcinoma	32	R0	no	No	No adjuvant treatment	0	Ex-Smoker	32.25	Not GD	0	19.3973
CRUK0085	1a	78	Male	White- British	Squamous cell carcinoma	29	R0	yes	No	No adjuvant treatment	0	Current Smoker	50.25	Clonal GD	0	23.6384
CRUK0086	1b	79	Male	White- British	Squamous cell carcinoma	42	R0	yes	No	Adjuvant	1	Ex-Smoker	92	Clonal GD	0	12.6904
CRUK0087	3a	81	Female	White- British	Squamous cell carcinoma	110	R0	no	No	No adjuvant treatment	1	Recent Ex-Smoker	2.1	Clonal GD	1	4.99726
CRUK0088	1a	81	Male	White- Other	Squamous cell carcinoma	10	R1	no	No	No adjuvant treatment	0	Ex-Smoker	40	Clonal GD	1	21.9945
CRUK0089	2a	66	Male	White- British	Squamous cell carcinoma	45	R0	yes	No	Adjuvant	0	Recent Ex-Smoker	15	Not GD	0	16.3726
CRUK0090	2a	65	Male	White- British	Squamous cell carcinoma	35	R0	yes	Yes	Adjuvant	1	Ex-Smoker	16.5	Clonal GD	0	27.1233
CRUK0091	1a	50	Female	White- British	Squamous cell carcinoma	15	R0	no	No	No adjuvant treatment	1	Recent Ex-Smoker	34	Not GD	0	28.8
CRUK0092	2a	76	Male	White- British	Squamous cell carcinoma	45	R0	no	No	No adjuvant treatment	1	Recent Ex-Smoker	100	Clonal GD	1	3.51781
CRUK0093	1a	69	Male	White- British	Squamous cell carcinoma	11	R0	no	No	No adjuvant treatment	1	Never Smoked	NA	Clonal GD	0	11.0466
CRUK0094	2a	34	Male	White- Other	Carcinosarcoma	35	R0	no	Yes	No adjuvant treatment	0	Never Smoked	NA	Not GD	1	8.94247
CRUK0095	1a	59	Female	White- British	Adenosquamous carcinoma	20	R0	yes	No	No adjuvant treatment	0	Recent Ex-Smoker	22.8	Not GD	0	24.8877
CRUK0096	2b	74	Female	White- British	Adenosquamous carcinoma	85	R0	no	No	No adjuvant treatment	0	Recent Ex-Smoker	53	Clonal GD	1	5.09589
CRUK0097	1b	76	Male	White- British	Large cell carcinoma	25	R0	no	Yes	No adjuvant treatment	0	Recent Ex-Smoker	118	Clonal GD	0	6.70685
CRUK0098	1b	55	Male	White- British	Carcinosarcoma	42	R0	no	No	No adjuvant treatment	1	Current Smoker	48.75	Clonal GD	1	1.11781
CRUK0099	3a	77	Male	White- British	Adenosquamous carcinoma	72	R0	yes	Yes	No adjuvant treatment	0	Ex-Smoker	48	Not GD	1	2.16986
CRUK0100	3a	49	Female	White- British	Large Cell Neuroendocrine	29	R0	no	No	Adjuvant	0	Recent Ex-Smoker	25	Clonal GD	1	14.9589
